# Supplementary material for: Corneal stromal stem cells reduce corneal scarring by mediating neutrophil infiltration after wounding
Source: PLOS journal article supplement (doi:10.1371/journal.pone.0171712), 2017-03-03
Supplement: S7 (10.1371/journal.pone.0171712.s007) [file journal.pone.0171712.s007]

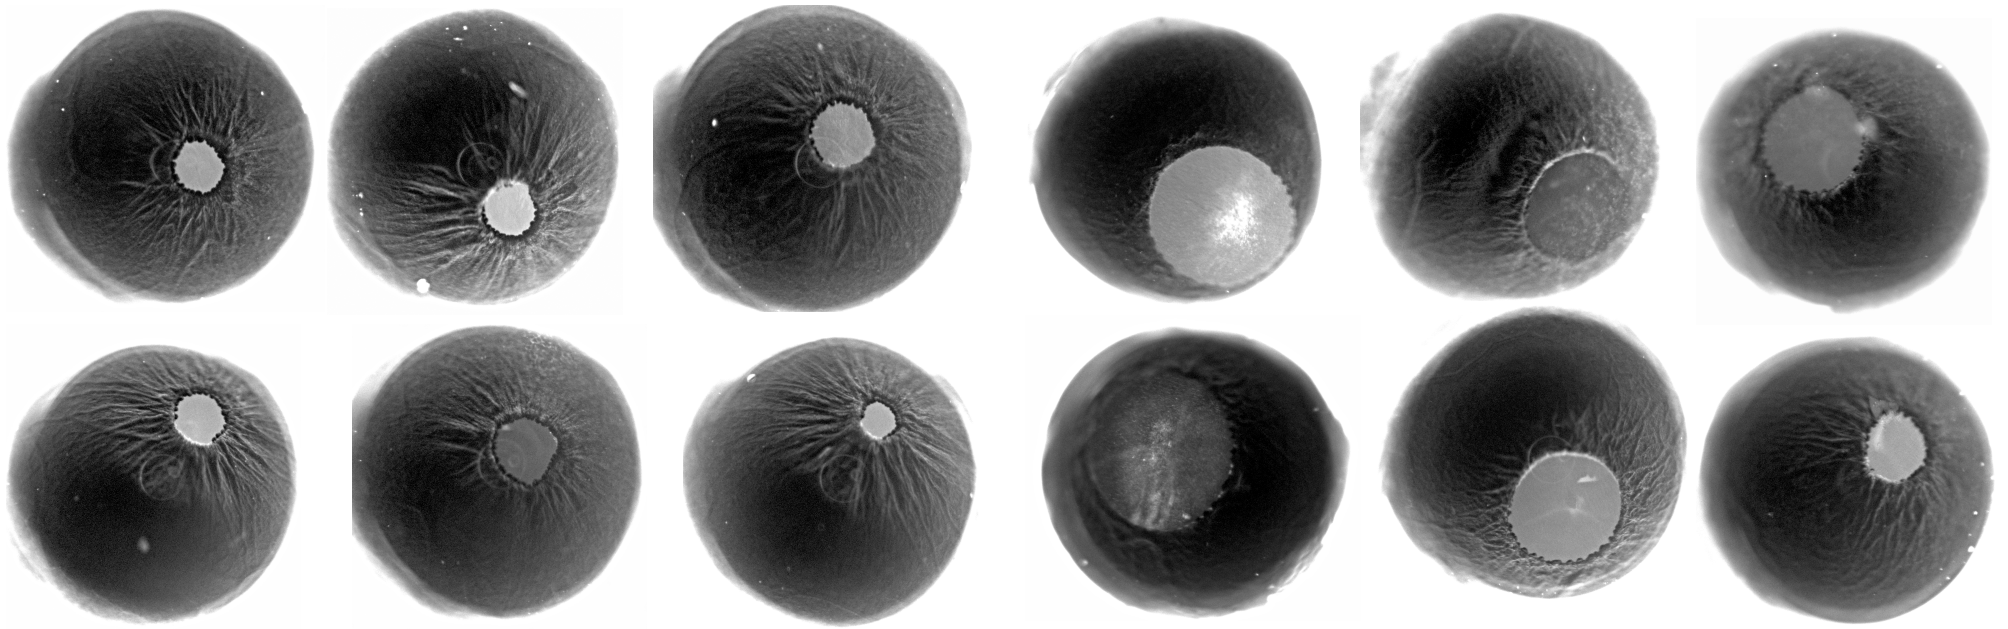

**S1 Fig. Scarring in eyes treated with CSSC after TSG-6 knock-down.** Fresh corneas were imaged ex vivo using indirect lighting, 14 days after wounding. Scar area was calculated from high resolution images by a trained observer in a masked fashion to obtain data in Table A in S4 Tables and Graph 5A in the manuscript. **T**, Treated with CSSC- siTSG6 RNA. **C**, Treated with CSSC-siCtrl RNA
